# Supplementary material
Source: Research Square preprint supplement (doi:10.21203/rs.3.rs-9104169/v1)
Supplement: Supplementary file 2 [file 66490b977c92fe83cf04ea61.docx]

**Table n°1** Clinical and laboratory features of the study cohort at the time of MPN diagnosis

| **Main characteristics at diagnosis** | **All patients  n=117** | **PV patients  n=76** | **ET patients  n=41** | **pa** | **pb** |
| --- | --- | --- | --- | --- | --- |
| Female, n (%) | 63 (53.8) | 37 (48.7) | 26 (63.4) | 0.18 | / |
| Age, median (IQR) | 64.0 (51.0-73.0) | 66.5 (60.0-74.3) | 51.0 (38.0-72.0) | 0.002 | / |
| Presence of JAK2V617F mutation, n (%) | 113 (97.4) | 75 (100.0) | 38 (92.7) | 0.04 | / |
| JAK2V617F allele burden, median (IQR) | 32.0 (15.0-61.0) | 39.0 (22.5-71.0) | 13.0 (6.0-22.0) | <0.0001 | / |
| **Blood count, median (IQR)** |  |  |  |  |  |
| Hemoglobin, g/dL | 16.2 (14.7-17.7) | 17.0 (15.9-18.5) | 14.3 (13.5-15.2) | <0.0001 | / |
| Hematocrit, % | 49.6 (45.3-54.9) | 53.0 (49.0-57.6) | 43.9 (41.5-45.5) | <0.0001 | / |
| Platelets, G/L | 536.0 (358.0-679.0) | 430.0 (283.0-562.0) | 659.0 (567.0-815.0) | <0.0001 | / |
| Leukocytes, G/L | 10.3 (8.4-13.6) | 10.5 (8.4-13.9) | 9.7 (8.4-11.0) | 0.1 | / |
| Neutrophils, G/L | 7.7 (5.5-10.1) | 8.2 (6.1-11.0) | 6.5 (5.2-8.2) | 0.03 | / |
| Monocytes, G/L | 0.6 (0.4-0.9) | 0.6 (0.4-0.9) | 0.6 (0.4-1.0) | 0.61 | / |
| Lymphocytes, G/L | 1.7 (1.2-2.3) | 1.6 (1.0-2.2) | 2.0 (1.6-2.6) | 0.03 | / |
| **VTE location, n (%)** |  |  |  |  |  |
| Deep vein thrombosis, lower limb | 53 (45.3) | 38 (50.0) | 15 (36.6) | 0.04 | 0.23 |
| Pulmonary embolism | 37 (31.6) | 25 (32.9) | 12 (29.3) | 0.85 |
| Deep vein thrombosis, upper limb | 6 (5.1) | 5 (6.6) | 1 (2.4) | 0.66 |
| Cerebral venous thrombosis | 21 (17.9) | 8 (10.5) | 13 (31.7) | 0.01 |

Abbreviations: PV: Polycythemia Vera, ET: Essential thrombocythemia, VTE: Venous Thromboembolism. IQR: interquartile range

a PV vs. TE patients : Mann–Whitney test for quantitative variables; χ2 test or Fisher's exact test for qualitative variables. Statistical analyses were performed on available data.

b We performed an additional Mann–Whitney U test to compare VTE location two by two, since a significant difference in the distribution of thrombotic sites was observed between PV and TE.

Statistical analyses were performed on available data.
