# Supplementary material
Source: Research Square preprint supplement (doi:10.21203/rs.3.rs-9104169/v1)
Supplement: Supplementary file 3 [file 6c8c81e96cbb09725daa3033.docx]

**Table n°3**. Comparative analysis between patients with or without VTE recurrence.

|  | **Recurrence  n=13** | **No recurrence  n=104** | **pa** |
| --- | --- | --- | --- |
| **Baseline characteristics** |  |  |  |
| Female, n (%) | 10 (76.9) | 53 (51.0) | 0.14 |
| Age at diagnosis, median (quartiles) | 62.0 (51.0-74.0) | 65.0 (52.5-73.0) | 0.48 |
| PV, n (%) | 9 (69.2) | 67 (64.4) | 1 |
| ET n (%) | 4 (30.8) | 37 (35.6) |
| Presence of JAK2V617F mutation, n (%) | 13 (100.0) | 100 (97.1) | 1 |
| JAK2V617F allele burden, median (quartiles) | 36.0 (16.0-66.0) | 31.1 (14.3-60.5) | 0.49 |
| **Follow-up characteristics** |  |  |  |
| Cytoreductive therapy, n (%) | 11 (84.6) | 97 (94.2) | 0.22 |
| Antithrombotic therapy, n (%) |  |  |  |
| Anticoagulant treatment | 5 (38.5) | 49 (47.6) | 0.5 |
| Antiplatelet therapy | 4 (30.8) | 36 (35.0) |
| Anticoagulant + antiplatelet therapy | 3 (23.1) | 10 (9.7) |
| None | 1 (7.7) | 8 (7.8) |
| European Leukemia Net Reponse Criteria met, n (%) | 1 (8.3) | 65 (68.4) | <0.0001 |

Abbreviations: PV: Polycythemia Vera, ET: Essential thrombocythemia, VTE: Venous Thromboembolism

a Recurrence vs. no recurrence: Mann–Whitney U test for quantitative variables; χ2 test or Fisher's exact test for qualitative variables. Statistical analyses were performed on available data.

b Analysis at the time of VTE recurrence or at the last update for patients without recurrence. IQR: interquartile range. Statistical analyses were performed on available data.
