# Supplementary material
Source: Research Square preprint supplement (doi:10.21203/rs.3.rs-9104169/v1)
Supplement: Supplementary file 4 [file 907fb93d748bc4e1af903032.docx]

**Table n°4**. Incidence of recurrent VTE thrombosis according to European leukemia net (ELN) response criteria and/or anticoagulation

|  | Number of patients | Recurrent VTE, n (%) | Incidence rate, % pt-years (95% CI) |
| --- | --- | --- | --- |
| All patients | 117 | 13 (11.1) | 1.80 (0.96-3.08) |
| Anticoagulation | 67 | 8 (11.9) | 2.24 (0.97-4.41) |
| No anticoagulation | 49 | 5 (10.2) | 1.38 (0.45-3.22) |
| ELN criteria met | 66 | 1 (1.5) | 0.25 (0.01-1.40) |
| ELN criteria not met | 41 | 11 (26.8) | 4.49 (2.24-8.03) |
| ELN criteria met / no anticoagulation | 24 | 0 (0) | 0 (0-2.35) |
| ELN criteria met / anticoagulation | 42 | 1 (2.4) | 0.42 (0.01-2.32) |
| ELN criteria not met / no anticoagulation | 21 | 5 (23.8) | 3.25 (1.06-7.59) |
| ELN criteria not met / anticoagulation | 20 | 6 (30) | 6.55 (2.40-14.26) |
