# Supplementary material
Source: Research Square preprint supplement (doi:10.21203/rs.3.rs-9104169/v1)
Supplement: Supplementary file 5 [file c51f0680b9dc0961f860ea6a.docx]

**Table n°2**. Detailed clinical description of the 13 patients with VTE recurrence, at the time of recurrence

| **MPN** | **Age** | **Initial thrombosis site** | **Recurrence site** | **Factor contributing to recurrence** | **Time to recurrence (years)** | **ELN criteria met** | **Cytoreductive therapy** | **Antiplatelet therapy** | **Anticoagulant therapy** |
| --- | --- | --- | --- | --- | --- | --- | --- | --- | --- |
| PV | 74 | PE | PE | Metastatic breast adenocarcinoma undergoing hormone therapy | 2.3 | no | Hydroxyurea | Aspirin | no |
| PV | 75 | PE | DVT | *missing* | 6.2 | no | Hydroxyurea | Aspirin | no |
| PV | 51 | DVT | DVT | *missing* | 1.1 | no | no | Aspirin | no |
| PV | 78 | PE | DVT and PE | Total hip replacement | 5.2 | no | Hydroxyurea | Aspirin | no |
| PV | 74 | DVT | DVT and PE | no | 2.3 | no | Hydroxyurea | Aspirin | DOAC |
| PV | 63 | CVT | CVT | *missing* | 6.4 | no | Hydroxyurea | Aspirin and Clopidogrel | VKA |
| PV | 54 | DVT | DVT | no | 4.0 | no | JAK inhibitor | no | no |
| PV | 21 | CVT | SVT | no | 4.1 | no | no | no | VKA |
| PV | 61 | PE | DVT | no | 8.9 | yes | JAK inhibitor | no | LMWH |
| ET | 72 | DVT | SVT | no | 6.0 | no | *missing* | no | VKA |
| ET | 62 | PE | PE | Cholecystectomy | 8.6 | no | Pipobroman | Aspirin | VKA |
| ET | 23 | DVT | PE | Post-partum | 8.6 | no | Hydroxyurea | no | DOAC |
| ET | 29 | CVT | SVT | no | 13.9 | *missing* | Hydroxyurea | no | VKA |

Abbreviations: MPN: Myeloproliferative neoplasm, PV: Polycythemia Vera, ET: Essential thrombocythemia, DVT: deep vein thrombosis, PE: pulmonary embolism, CVT: Cerebral venous thrombosis, SVT: Splanchnic vein thrombosis, ELN: European Leukemia Net, DOAC: Direct oral anticoagulant, VKA: Vitamin K antagonists, LMWH: Low-molecular-weight heparin
